# 1 Frontal and parietal alpha oscillations reflect 2 attentional modulation of cross-modal matching

3  
4 Jonas Misselhorn<sup>1\*</sup>, Uwe Frieze<sup>1,2</sup>, & Andreas K. Engel<sup>1</sup>

5  
6 <sup>1</sup>University Medical Center Hamburg-Eppendorf, Department of Neurophysiology and Pathophysiology,  
7 Hamburg, Germany

8 <sup>2</sup>University of Osnabrück, Institute of Cognitive Science, Osnabrück, Germany

9  
10 \*Correspondence: [j.misselhorn@uke.de](mailto:j.misselhorn@uke.de)

## 13 Abstract

14 Multisensory perception is characterised by attentional selection of relevant sensory inputs and  
15 exploitation of cross-modal similarities that promote cross-modal binding. Underlying  
16 mechanisms of both top-down and bottom-up modulations have been linked to changes in  
17 alpha/gamma dynamics in primary sensory cortices. Accordingly, it has been proposed that  
18 alpha oscillations provide pulsed inhibition for gamma activity and thereby dynamically route  
19 cortical information flow. In this study, we employed a recently introduced multisensory  
20 paradigm incorporating both bottom-up and top-down aspects of cross-modal attention in an  
21 EEG study. The same trimodal stimuli were presented in two distinct attentional conditions,  
22 focused on visual-tactile or audio-visual components, for which cross-modal congruence of  
23 amplitude changes had to be evaluated. Neither top-down nor bottom-up cross-modal attention  
24 modulated alpha or gamma power in primary sensory cortices. Instead, we found alpha band  
25 effects in bilateral frontal and right parietal cortex. We propose that frontal alpha oscillations  
26 reflect the origin of top-down control regulating perceptual gains and that parietal alpha relates  
27 to sensory re-orienting. Taken together, we suggest that the idea of selective cortical routing  
28 via alpha oscillations can be extended from sensory cortices to the fronto-parietal attention  
29 network.

## 32 Acknowledgements

33 This work was supported by grants from the German Research Foundation (SFB 936/A3 and  
34 SFB TRR 169/B1 to A.K.E. as well as DFG FR-3366-1 to U.F.), the EU (ERC-2010-AdG-  
35 269716 to A.K.E.) and the Landesforschungsförderung Hamburg (CROSS FV 25 to A.K.E.).  
36 We thank Bettina Schwab for invaluable discussions on the manuscript and Nina Noverijan for  
37 assistance in data recording.

## 38 Author contributions

39 J.M., U.F. and A.K.E. designed the experiment. J.M. recorded the data. J.M. analysed the data.  
40 J.M. wrote the main manuscript text. J.M., U.F. and A.K.E. reviewed the manuscript.

## 43 Competing Interests

44 The authors declare that they have no competing interests.

## 46 Data Availability

47 Behavioural and electrophysiological data will be made available upon request to the  
48 corresponding author.

49

## Introduction

50 Human perception is governed by constant influx of information through multiple  
51 sensory channels. The act of perceiving routes information flow by active engagement with the  
52 multisensory environment, causing sensory inputs to be constantly shaped by modulatory  
53 signals reflecting behavioural goals, contextual demands and structural properties of the  
54 environment. Spotting a singing bird in a tree, for instance, does not depend on tactile  
55 processing but on evaluating visual and auditory signals for temporo-spatial congruence.  
56 Lacing shoes, on the other hand, makes little use of audition but integrates vision and tactile  
57 perception in a goal-directed manner. These examples illustrate that multisensory perception is  
58 shaped by top-down and bottom-up modulation of sensory inputs. Attempts to understand  
59 multisensory perception accordingly need to address neural mechanisms underlying both  
60 selection of relevant sensory input and exploitation of cross-modal similarities that promote  
61 cross-modal binding.

62 A well-described mechanism of stimulus selection via attentional modulation is gain  
63 regulation of population responses in sensory regions<sup>1,2</sup>. In MEG and EEG studies, these gain  
64 regulations are likely reflected in alpha band dynamics<sup>3</sup>. Jensen and Mazaheri<sup>4</sup> propose that  
65 alpha band activity plays a general role in the up- and down-regulation of cortical processing  
66 capabilities (“gating by inhibition”). By pulsed inhibition, alpha oscillations could effectively  
67 gate gamma band activity related to active processing<sup>5</sup>. This has been shown repeatedly in the  
68 context of spatial attention<sup>6,7,8</sup> while evidence supporting its applicability to cross-modal  
69 attention is sparse<sup>9,10</sup>. Additionally, it is unclear whether pulsed inhibition regulates cortical  
70 processing beyond sensory cortices, for instance in cortical regions exerting top-down control.

71 Mechanisms underlying stimulus-driven cross-modal binding are less well understood.  
72 In fact, it remains a matter of debate at what stage of cortical processing such interactions take  
73 place<sup>11,12,13</sup>. While some evidence suggests that input to distinct modalities is processed in  
74 parallel and only converges later in regions of the temporal and parietal lobe<sup>14,15,16</sup>, other  
75 evidence points out that interactions can already take place at the level of primary sensory  
76 regions<sup>17,18,19</sup>. The disparity of findings is not surprising given that factors driving cross-modal  
77 integration span from psychophysical (spatial/temporal congruence) to memory-dependent  
78 (semantic congruence and cross-modal correspondences). Yet, a linking observation is that low-  
79 and high-level integration have been associated with changes in gamma band activity<sup>13,20,21</sup>.

80 In the EEG study reported here, we employed a recently introduced multisensory  
81 paradigm incorporating both bottom-up and top-down aspects of cross-modal attention<sup>22</sup>. This  
82 paradigm involved a trimodal stimulus consisting of a visual, an auditory and a tactile

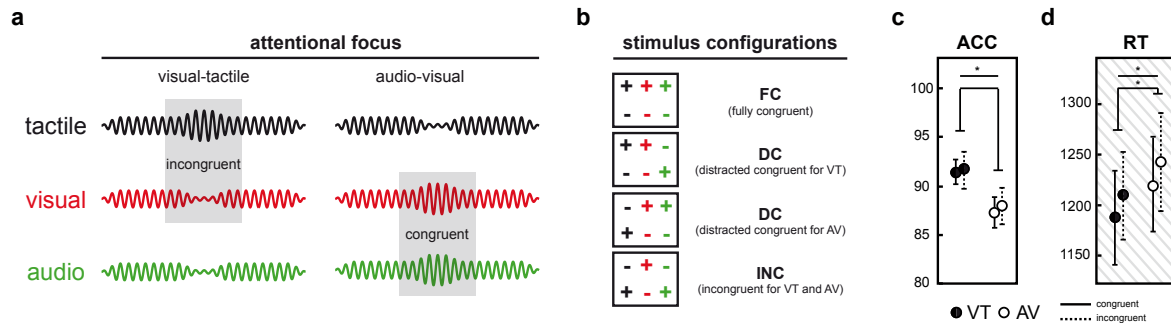

**Figure 1: Schematic of matching task and behavioural results.** **a**) Illustration of example trials in the two attentional conditions. Under visual-tactile focus (left), the changes in the target stimuli are incongruent, as the tactile stimulus (black) increases in intensity while the visual stimulus (red) decreases. Under audio-visual focus (right), target change is congruent, since visual and auditory (green) stimuli both increase in intensity. **b**) In each block, all possible stimulus configurations occurred with equal probability. Intensity changes are depicted by coloured plus/minus signs (colour coding as introduced in a)). **c**) Accuracy (ACC) in percentage correct. Error bars represent standard deviations. There was no effects of experimental conditions. **d**) Reactions times in milliseconds (RTs). Error bars represent standard deviations. *ATTENTION* as well as *CONGRUENCE* significantly affected the timing of responses, but not the accuracy of responding (Note: RTs were collected in a previous behavioural study<sup>21</sup> from the same sample of participants).

83 component that each underwent a brief increase or decrease in intensity. Participants had to  
 84 attend two of the stimuli and had to decide whether the attended pair changed congruently or  
 85 incongruently. In a similar study investigating audio-visual matching with MEG, changes in  
 86 primary sensory alpha and gamma activity were more profound when participants attended  
 87 presentations compared to when they were ignored<sup>10</sup>. In order to further investigate whether  
 88 this modulation of alpha/gamma band dynamics holds in situations where attention is not  
 89 holistic but rather modality-based, we presented the same trimodal stimuli in two distinct  
 90 attentional conditions (top-down), focused on either visual-tactile (VT) or audio-visual (AV)  
 91 components, for which cross-modal congruence (bottom-up) of amplitude changes had to be  
 92 evaluated (Fig. 1 a). We expected top-down cross-modal attention to selectively enhance  
 93 primary sensory alpha activity for irrelevant modalities and decrease alpha activity for attended  
 94 modalities. This increase/decrease in alpha power might be accompanied by a decrease/increase  
 95 in gamma band activity. As a bottom-up effect of cross-modal binding, gamma band activity  
 96 in sensory cortices or temporal/parietal cortex is expected to be modulated by cross-modal  
 97 congruence.

## 98 Results

### 99 Psychophysics and behaviour

100 The trimodal stimulus material was designed such that the target amplitude changes in  
 101 each modality were equally salient. This was achieved by estimating detection thresholds for  
 102 each modality and change direction separately using a psychophysical staircase procedure<sup>23</sup>.  
 103 Yet, a questionnaire that was completed during debriefing of a preceding behavioural study<sup>22</sup>

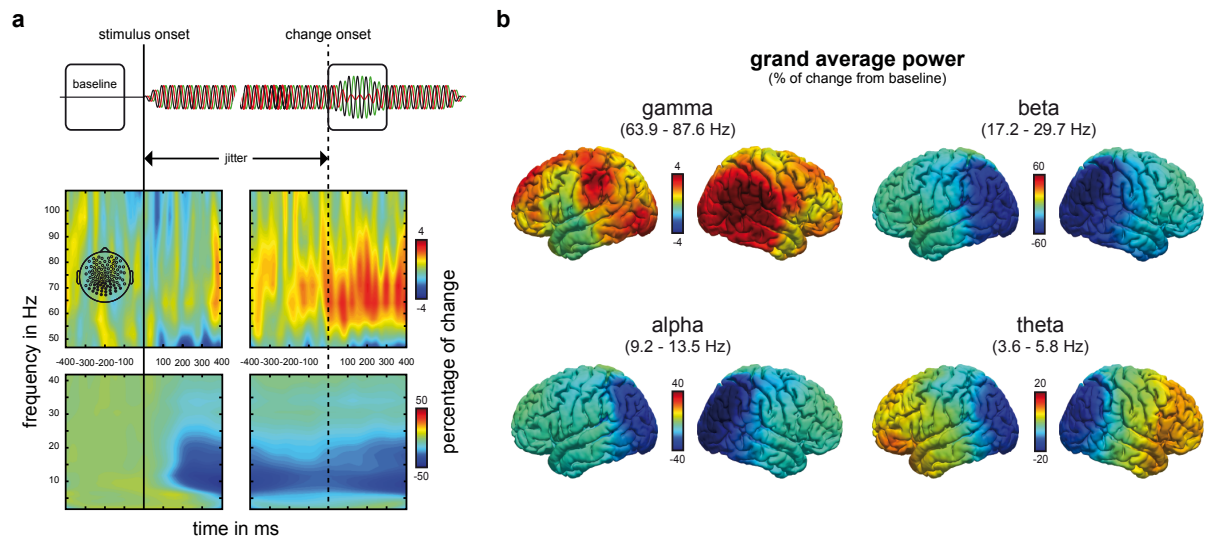

**Figure 2: Average time-frequency dynamics in sensor and source space. a)** Time-frequency dynamics in sensor space at occipito-parietal channels (topography shown in upper left panel), time locked to stimulus onset (left panels, black solid vertical line) and change onset (right panels, black dashed vertical line). **Top:** Schematic of temporal trial structure displaying the two relevant time-windows used for analysis: a baseline (-400:-100 ms) separated by a jitter (stimulus to change onset between 700 and 1000 ms) from the change interval (0:300 ms). **Bottom:** Time-frequency plots from posterior sensors. Values represent percentage of change from baseline. **b)** Distribution of band-limited power on the cortical surface in the change interval relative to baseline.

104 indicated that subjective salience of the sensory components was in fact not equal but strongest  
105 for the visual component. In particular, participants reported that the visual component was  
106 hardest to ignore when it was task irrelevant (pairwise Wilcoxon rank sum test, Bonferroni  
107 corrected, V-T:  $p = .002$ , V-A:  $p = .24$ , T-A:  $p = .26$ ). This should be kept in mind for the  
108 discussion of the effects of cross-modal attention.

109 The timing and accuracy of responding was analysed with a repeated measure analysis  
110 of variance (ANOVA) with factors *ATTENTION* (VT vs. AV) and *CONGRUENCE* (congruent  
111 vs. incongruent). Responses were faster but not more accurate when subjects attended cross-  
112 modally congruent pairs (Fig. 1 d;  $p < .001$ ,  $\eta_p^2 = 0.471$ ). When participants attended VT, timing  
113 as well as accuracy of responding was significantly better compared with the AV conditions  
114 (RT:  $p = .036$ ,  $\eta_p^2 = 0.201$ ; ACC:  $p = .005$ ,  $\eta_p^2 = 0.327$ ). No interaction effects between  
115 *ATTENTION* and *CONGRUENCE* were observed.

## 116 ROI analysis

117 In Figure 2, we present an overview of time-frequency dynamics during the task as well  
118 as distributions of band-limited power for theta, alpha, beta and gamma bands in source space.  
119 In order to investigate power changes in oscillatory activity in primary sensory areas occurring  
120 after the stimulus increases or decreases, we conducted a regions of interest (ROI) analysis on  
121 source projected EEG data in primary visual, auditory and somatosensory cortex. Statistical  
122 evaluation was carried out with a repeated measures ANOVA with factors *ROI*, *ATTENTION*



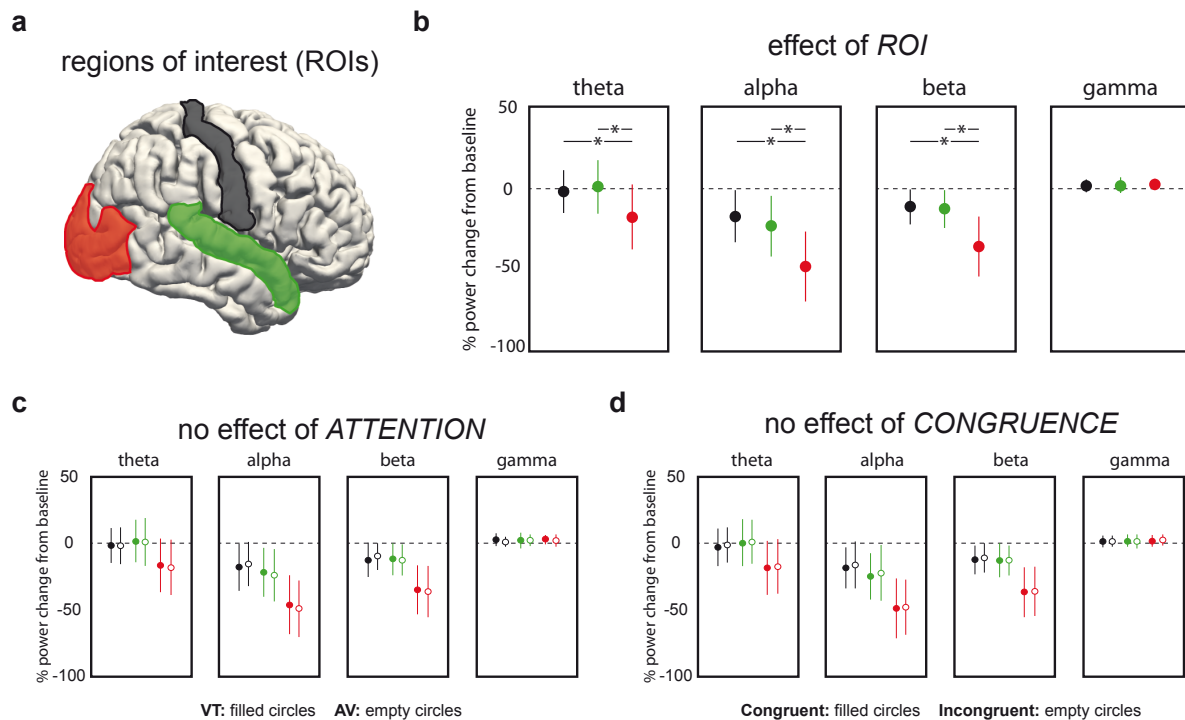

**Figure 3: Regions of interest (ROI) analysis of band-limited power during change epoch in primary sensory areas. a)** Primary sensory areas used for ROI ANOVA with factors *ATTENTION* (VT vs. AV), *CONGRUENCE* (congruent vs. incongruent) and *ROI* (visual vs. auditory vs. somatosensory); visual = red, auditory = green, somatosensory = black. **b)** Effect of *ROI* is significant for theta, alpha and beta bands, but not gamma band. Asterisk signifies significant comparisons ( $p < .001$ ). **c)** No significant effect of *ATTENTION*. **d)** No significant effect of *CONGRUENCE*.

123 and *CONGRUENCE* separately for each frequency band (Fig. 3, see *Methods* for details).  
 124 Significant effects of *ROI* were observed for theta, alpha and beta bands (for all,  $p < .001$  and  
 125  $\eta_p^2 > 0.5$ ; see Fig. 3 b). In the gamma band, *ROI* did not explain a significant amount of variance  
 126 ( $p = .689$ ). Simple effects analysis for the lower frequency bands showed that decreases in  
 127 power were significantly stronger in visual compared with both auditory and somatosensory  
 128 ROIs (for all comparisons,  $p < .001$ ; Fig. 3 b). Power changes in auditory and somatosensory  
 129 ROIs did not differ (for all,  $p > .05$ ). The main effects and interactions of *ATTENTION* and  
 130 *CONGRUENCE* were not significant (for all,  $p > .05$ ; Fig. 3 c + d).

### 131 Cluster statistics

132 To complement the ROI analysis, we conducted a whole-brain analysis of task-related  
 133 power changes in the interval after stimulus increases and decreases evaluated by means of  
 134 nonparametric cluster-based permutation statistics (see *Methods* for details). For the  
 135 *ATTENTION* contrast (VT minus AV), significant differences were found in the alpha band. In  
 136 two roughly symmetric clusters, VT attention was associated with stronger power decrease of  
 137 alpha oscillations when compared with AV attention (Fig. 4 a). In the left hemisphere, the  
 138 cluster was situated in the border region of pre-central gyrus, middle frontal gyrus (MFG) and

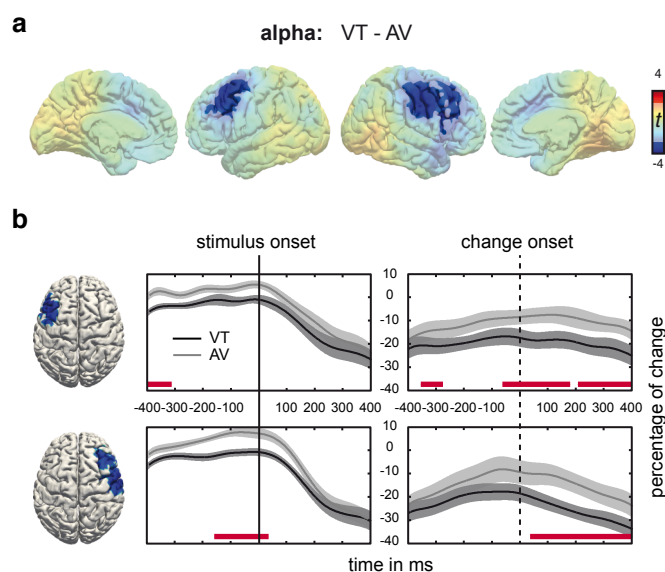

**Figure 4: Effect of ATTENTION (VT - AV).** **a**) Cluster-based permutation statistic of the contrast VT *minus* AV in the alpha band during change interval. T-values of the respective contrasts are depicted. Shaded voxels are non-significant. **b**) Time-course of alpha activity within significant clusters. Shading corresponds to the standard error of the mean. Red bars indicate temporal regions of significance as determined by permutation testing (see *Methods* for details).

139 superior frontal gyrus encompassing the frontal eye fields (FEF;  $p = .031$ ). In the right  
 140 hemisphere, the cluster was situated similarly but expanded further into pre- and post-central  
 141 gyrus ( $p = .005$ ). In a next step, we analysed time courses of alpha power modulations within  
 142 these two clusters (Fig. 4 b, see *Methods*). Throughout the entire time course, alpha power was  
 143 lower for VT than for AV attention. This difference was significant before stimulus onset in  
 144 both hemispheres (left: [-400; -312] ms, right: [-165; 43] ms), in a short epoch prior to change  
 145 onset in the left hemisphere ([-348; -286] ms) and throughout the whole change epoch in both  
 146 hemispheres (left: [-69; 177] ms and [211; 400] ms, right: [43; 400] ms).

147 When evaluating the effect of *CONGRUENCE* (attended congruent *minus* attended  
 148 incongruent), significant differences were found in alpha and theta bands (Fig. 5). Theta power  
 149 was higher for congruent trials compared to incongruent trials in large parts of the medial wall  
 150 of both hemispheres (Fig. 5 a). This effect was significant in a left hemispheric cluster stretching  
 151 from posterior to anterior cingulate cortex. In a next step, we analysed the contributions of fully  
 152 congruent (FC) and distracted congruent (DC) trials to the overall effect of congruence (see  
 153 Fig. 1 b and *Methods* for details). It was driven by FC trials for which theta power was increased  
 154 in cingulate cortex of both hemispheres, and in small clusters in left and right intraparietal  
 155 sulcus (IPS) as well as left inferior frontal gyrus (IFG) and right MFG (Fig. 5 c). No significant  
 156 theta power differences were seen when comparing distracted congruent with incongruent trials  
 157 (Fig. 5 e).

158 In the alpha band, cross-modal congruence modulated power in large parts of medial  
 159 and lateral cortex. In incongruent trials, stronger decrements of alpha power occurred in  
 160 bilateral medial superior frontal cortex and left MFG (Fig. 5 b). Congruent trials were associated  
 161 with stronger decrements in alpha power in bilateral medial occipito-parietal cortex and right

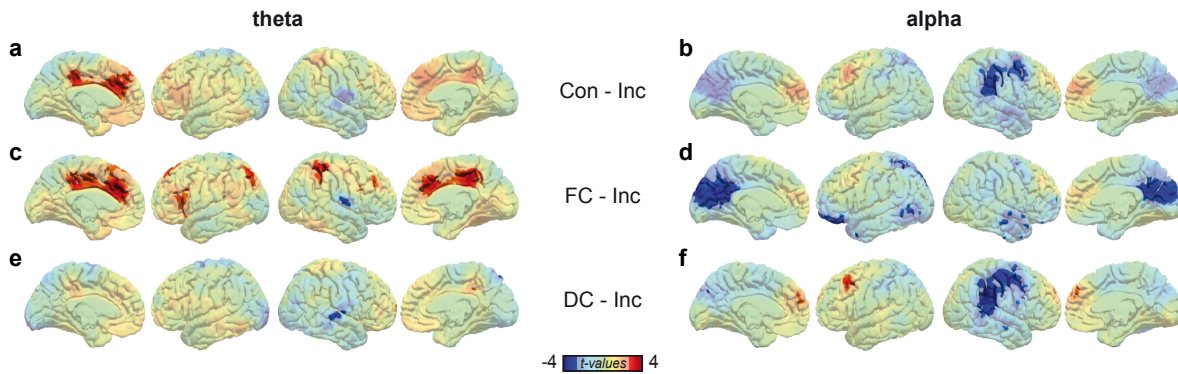

**Figure 5. Effect of CONGRUENCE (Congruent - Incongruent).** **a+b)** Cluster-based permutation statistic of the contrast *Congruent - Incongruent* in the alpha (a) and theta (b) band during change interval. All subplots depict t-values. Shaded voxels are non-significant. **c)** Contrast between theta power in *fully congruent* (FC) and *incongruent* trials. **d)** Contrast between alpha power in *fully congruent* (FC) and *incongruent* trials. **e)** Contrast between theta power in *distracted congruent* (DC) and *incongruent* trials. **f)** Contrast between alpha power in *distracted congruent* (DC) and *incongruent* trials.

162 inferior parietal and middle frontal cortex. The latter difference was significant in a cluster  
163 covering the right temporoparietal junction (TPJ), but stretching rostrally towards right MFG.  
164 Next, we disentangled contributions from FC and DC trials as before for theta power. While  
165 FC trials significantly drove the effect in medial occipito-parietal cortex (Fig. 5 d), DC trials  
166 contributed significantly to the effect in medial and left middle frontal cortex (Fig. 5 e). The  
167 effect in right TPJ and MFG was dominated by DC trials (Fig. 5 d).

## 168 Discussion

169 We investigated bottom-up and top-down modulation of sensory processing in a cross-  
170 modal matching task involving visual, auditory and tactile perception. Contrary to our  
171 expectations, we did not find alpha/gamma oscillations in primary sensory areas to be  
172 modulated by bottom-up or top-down cross-modal attention. This finding is surprising given  
173 that both processes have often been noted to be accompanied by alpha/gamma modulations in  
174 sensory cortices<sup>3,6,7,10,18,19</sup>. Our explanation for the lack of primary sensory modulation is the  
175 nature of the task: many, if not most, multisensory studies employ detection tasks with near-  
176 threshold sensory stimulation. In these situations of low sensory drive, both bottom-up and top-  
177 down modulation of sensory input can be expected to have higher impact compared with  
178 situations of strong sensory drive. Stimulus-driven cross-modal enhancement by spatio-  
179 temporal congruence, for instance, is assumed to obey the law of inverse effectiveness, meaning  
180 that there is an inverse relationship between possible cross-modal enhancement and stimulus  
181 intensity<sup>24</sup>. Here, however, all stimulus intensities were clearly supra-threshold with  
182 superimposed amplitude changes. Top-down as well as bottom-up modulation of sensory  
183 processing might thus be subtle and hence not detectable by EEG. Instead, we found theta  
184 oscillations in cingulate cortex and most notably alpha oscillations in frontal and parietal cortex  
185 to be modulated. In the following, we propose that frontal alpha oscillations reflect the origin

186 of top-down control regulating perceptual gains and that parietal alpha oscillations relate to  
187 sensory (re-)orienting. Theta activity in cingulate cortex is finally discussed in the context of  
188 adaptive task-switching behaviour circumventing cross-modal matching.

189 Reduction of alpha power in bilateral FEF and MFG as well as right pre-/post-central  
190 gyrus was stronger for VT cross-modal attention compared to AV attention. This difference  
191 was significant even before stimulus onset. Besides their role in oculomotor control, the FEF  
192 have been described as important structures in top-down attention<sup>25</sup>. In a study using TMS,  
193 Grosbas and Paus showed that disruption of activity in FEF shortly before the onset of the target  
194 in a visuospatial covert attention task facilitated responses<sup>26</sup>. Conversely, 10 Hz TMS over the  
195 right FEF was shown to impair visual search of unpredictable items with low salience<sup>27</sup>. Moore  
196 and Armstrong reconciled this conflicting evidence by suggesting that the FEF has a general  
197 role in regulating visual gain<sup>28</sup>. In their study, electric stimulation of FEF in the monkey either  
198 enhanced or inhibited responses to visual stimuli in V4 depending on whether retinotopically  
199 corresponding sites were stimulated. Studies in humans supported this idea by showing that  
200 TMS over FEF could increase phosphene or contrast sensitivity of extrastriate cortex<sup>29,30</sup>. This  
201 top-down modulation of visual cortex was demonstrated even in the absence of sensory input<sup>31</sup>.  
202 Likewise, anticipatory alpha and stimulus related gamma activity in occipito-parietal cortex  
203 could be modulated by TMS over FEF<sup>32</sup>. The strength of modulation was shown to correlate  
204 with the strength of structural connectivity between frontal and parietal cortex via the superior  
205 longitudinal fasciculus<sup>33</sup>. Thus, animal and human studies jointly conclude that the FEF can  
206 dynamically modulate the gain of down-stream visual cortex independent of sensory input. In  
207 our study, FEF/MFG likely facilitated cross-modal matching by modulating visual gain to  
208 counter visual dominance. Although stimulus intensity was titrated to be balanced across  
209 modalities (see *Methods*), we have reason to assume that perceived salience was highest for the  
210 visual component. In a questionnaire that was completed during debriefing of the preceding  
211 behavioural study, we asked participants to rank the difficulty to ignore a given modality. Most  
212 participants reported that visual components were hardest and tactile components easiest to  
213 ignore. This finding is in line with a pattern of sensory dominance found for combinations of  
214 visual, auditory and somatosensory stimuli in a discrimination task<sup>34</sup>. Sensory dominance can  
215 be problematic under the assumption that cross-modal matching is not independent of  
216 perceptual gain. This is most likely the case for stimulus-driven aspects of multisensory  
217 integration – the idea of inverse effectiveness, after all, assumes multimodal stimuli of low but  
218 comparable intensity<sup>24</sup>. Consequentially, decreased power of alpha oscillations in FEF/MFG is  
219 taken as evidence for an increased down-regulation of visual gain in VT conditions to account  
220 for unequal subjective salience of the stimuli to be matched.

221 As discussed above, balancing perceptual gains across modalities by top-down  
222 modulation likely enables optimal use of stimulus-driven aspects of cross-modal matching.  
223 These bottom-up factors were ubiquitous in this task; on each trial, participants were  
224 simultaneously confronted with three salient events, that is, intensity changes in each modality.  
225 Although each change of intensity by itself possessed some degree of bottom-up salience, we  
226 suggest that cross-modal congruence amplified salience through cross-modal binding<sup>13</sup>. When  
227 cross-modal binding was enhanced between attended modalities, responses were facilitated.  
228 This was especially pronounced for fully congruent trials where conflict, and thus the need for  
229 actual matching, was absent. All other trials were either distracted congruent (attended  
230 modalities change congruently, but the distractor diverged) or attended incongruent (one of the  
231 attended modalities is congruent to the distractor). In these cases, cross-modal binding was  
232 always stronger between two given modalities compared to the respective third. When  
233 contrasting the EEG of these trials, we find alpha band effects in the right temporoparietal  
234 junction (rTPJ) and right MFG. Specifically, distracted congruent conditions were associated  
235 with decreased power of alpha oscillations in these regions compared with attended incongruent  
236 trials. In accordance with the “gating by inhibition” theory, we conclude that the rTPJ/rMFG  
237 were more strongly disinhibited when attended modalities had a stronger bottom-up drive for  
238 cross-modal binding. The TPJ receives inputs from visual, auditory and somatosensory cortex  
239 and is richly connected to temporal and frontal sites, making it an important hub for the  
240 interaction of multisensory integration and attention<sup>35</sup>. Accordingly, lesions to the right TPJ  
241 typically result in neglect<sup>36,37</sup>. A dominant interpretation of rTPJ’s functional role is its  
242 involvement in (spatial) re-orienting based on stimulus salience<sup>38</sup>. In a model integrating goal-  
243 directed and stimulus-driven attention, it is suggested that a dorsal network comprising FEF  
244 and IPS instantiates attentional sets. As a counterpart, a ventral network comprising rTPJ and  
245 right ventral frontal gyrus mediates bottom-up signals acting as a circuit-breaker for the dorsal  
246 system. Studies employing multisensory paradigms have noted rTPJ’s involvement in  
247 processing cross-modal congruence. In a study investigating visual-tactile pattern matching,  
248 pre-stimulus alpha and beta power in right supramarginal gyrus differentiated between  
249 detection and congruence-evaluation tasks<sup>39</sup>. Another study showed that alpha power in right  
250 posterior regions was more strongly suppressed during congruent compared with incongruent  
251 audio-visual speech presentations<sup>40</sup>. Taken together with our results, we suggest that the rTPJ  
252 detects the increased salience of congruent cross-modal events. While each trial might, in  
253 principle, result in attentional capture by any of the three modalities, cross-modal binding by  
254 congruence might serve as a reliable “cue” for re-orienting towards the relevant modalities.  
255 Thereby, cross-modal binding between attended modalities might support modality-based re-  
256 orienting.



257 As pointed out above, fully congruent trials were characterised by the absence of cross-  
258 modal conflict. In the EEG, these highly salient trials were associated with stronger alpha power  
259 reductions in medial occipito-parietal cortex. In an event-related potentials study featuring  
260 visual, auditory and somatosensory stimuli, RT facilitation was correlated with the latency of  
261 the P300, which was localised in precuneus<sup>40</sup>. Other research suggests that alpha power  
262 reductions in occipito-parietal cortex and P300 dynamics are functionally coupled<sup>41</sup>. Here,  
263 enhanced involvement of medial occipito-parietal cortex is proposed to reflect increased  
264 bottom-up salience due to multisensory enhancement, i.e., increased perceptual gains of  
265 concurrent congruent sensory input to more than one modality<sup>42</sup>. In addition to mere bottom-  
266 up sensory salience, fully congruent stimuli occurred in only 25 % of all trials and were thereby  
267 salient. Actual cross-modal matching was required only in the remaining 75 % of trials where  
268 two modalities changed congruently while the third modality diverged. An efficient strategy  
269 would accordingly be to “switch” between these two tasks, i.e., between detecting highly salient  
270 events and cross-modal matching of conflicting input. In addition to the alpha band effect in  
271 precuneus, fully congruent trials were also associated with a relative increase in theta power in  
272 bilateral cingulate cortex. Theta band activity in cingulate cortex has previously been related to  
273 the adjustment of stimulus response mappings<sup>43</sup>. Together with insular cortex, cingulate cortex  
274 is part of a salience network which has importance for both bottom-up detection of salient  
275 events and switching between large-scale networks to adaptively control behaviour<sup>44</sup>. Here, it  
276 is suggested that reduced alpha power in medial occipito-parietal cortex related to multisensory  
277 enhancement acts as a salience signal detected by cingulate cortex which in turn initiates  
278 adaptive task-switching behaviour.

279 Taken together, we provide evidence that cross-modal matching in complex  
280 multisensory environments heavily relies on mechanisms of attention. Our results contrast with  
281 the majority of studies on multisensory integration concerned with stimulus detection where  
282 attentional load is typically low. Here, participants were confronted with a highly challenging  
283 multisensory setting. In order to counter the bias imposed by visual dominance, top-down  
284 regulation of perceptual gains likely supported an optimal exploitation of cross-modal  
285 similarities that promote perceptual binding. This was associated with decreased alpha band  
286 power in frontal cortices proposed to reflect the origin of top-down modulation. Likewise,  
287 bottom-up drive for cross-modal binding was related to changes in alpha power in right parietal  
288 cortex proposed to represent the bottom-up modulatory signal underlying sensory re-orienting.  
289 Both findings provide evidence for an extension of the idea that alpha/gamma dynamics  
290 indicate selective cortical routing beyond sensory cortex to the fronto-parietal attention  
291 network.

292

## Methods

### 293 **Participants**

294 Twenty-one participants entered the study and received monetary compensation for  
295 their participation. They were on average  $23.8 \pm 2.5$  years old and 11 of them were female (10  
296 male). Vision, audition and tactile perception were normal and none of them had a history of  
297 neurological or psychiatric disorders. After an explanation of the experimental procedure,  
298 participants gave written consent. The ethics committee of the University Medical Center  
299 Hamburg-Eppendorf approved the study which was carried out in accordance with the  
300 declaration of Helsinki.

### 301 **Experimental design**

302 On each trial, we presented a trimodal stimulus consisting of a visual, an auditory and a  
303 tactile component that each underwent a brief increase or decrease in intensity (see *Stimulus*  
304 *Material* for details). Block-wise, participants attended either visual-tactile (VT) or audio-  
305 visual (AV) bimodal pairs and ignored the respective third component. The task was to decide  
306 whether the attended bimodal pairs changed congruently (i.e., in the same direction) or  
307 incongruently (i.e., in different directions; see Fig. 1 a). Verbal responses had to be withheld  
308 until stimulus offset to minimise myogenic artifacts. Therefore, reaction times (RTs) could not  
309 be evaluated. Instead, we present RT data of the same sample of participants from the  
310 behavioural study preceding the EEG study<sup>22</sup>. In each block, all possible eight stimulus  
311 configurations of increases and decreases across modalities were presented with equal  
312 probability (Fig. 1 b). VT and AV blocks containing 64 trials presented in randomised order  
313 were alternating. Data were collected on two separate days with identical experimental  
314 procedure so that EEG data of 1280 trials was collected from each participant. Prior to statistical  
315 analysis, trials were pooled without taking change direction into account. For instance, fully  
316 congruent trials were both trials where all modalities underwent decrements and trials where  
317 all modalities underwent increments (Fig. 1 b, pooling is indicated by boxes).

### 318 **Stimulus material**

319 Visual contrast, auditory loudness and vibration strength were experimentally increased  
320 or decreased. The magnitudes of change per modality and direction were individually estimated  
321 prior to the experimental sessions using the same psychometric step function as described in  
322 Misselhorn et al. (QUEST)<sup>22,23</sup>. Intensity changes had a duration of 300 ms and onsets were  
323 jittered across trials between 700 and 1000 ms after stimulus onset (Fig. 2 a). In total, sensory  
324 stimulation had a fixed duration of 2 s. As visual stimulation, an expanding circular grating was  
325 centrally presented against a grey background on a CRT screen with a visual angle of 5°. The

326 auditory component consisted of a complex sinusoidal tone (13 sine waves: 64 Hz and its first  
327 6 harmonics as well as 91 Hz and its first 5 harmonics, low-frequency modulator: 0.8 Hz) played  
328 back with audiometric insert earphones binaurally at 70 dB (E-A-RTONE 3A, 3M, USA). As  
329 tactile stimulation, high-frequency vibrations (250 Hz on C2 tactors, Engineering Acoustics  
330 Inc., USA) were delivered to the tips of both index fingers.

### 331 **EEG**

332 EEG was recorded from 128 active electrodes (Easy Cap, Germany) including four  
333 ocular electrodes referenced to the nose. Data was sampled at 1000 Hz with an amplitude  
334 resolution of 0.1  $\mu$ V using BRAINAMP MR amplifier (Brain Products, Germany) and digitised  
335 after analog filtering (low cutoff: 10 s, high cutoff: 1000 Hz). Offline, data was down-sampled  
336 to 500 Hz and digitally filtered (high-pass: 1 Hz, low-pass: 120 Hz, notch: 49-51 Hz, 99-101  
337 Hz). Epochs of 2.5 s were cut from -500 ms relative to stimulus onset until stimulus offset and  
338 normalised to the pre-stimulus baseline. Next, data was re-referenced to the common average  
339 and linear trends were removed from all epochs. From the four ocular channels, two bipolar  
340 channels for horizontal and vertical eye movements were derived.

341 **Pre-processing.** Trials with incorrect answer and large non-stereotypical artifacts were  
342 excluded from further processing. Subsequently, independent component analysis (ICA) was  
343 performed separately for low and high frequency bands (low band: 1-30 Hz, high band: 30-120  
344 Hz). Thereby, stereotypical low-frequency artifacts (for instance eye movements and heart beat)  
345 and high-frequency artifacts (i.e. myogenic activity) could be separated more reliably from  
346 neuronal activity. For both bands, principal components analysis was performed first to reduce  
347 data such that 99 % of variance is retained. Subsequently, ICA was performed on the rank-  
348 reduced data using the infomax algorithm<sup>45</sup>. Artifactual ICs were identified and rejected with  
349 respect to time course, spectrum and sensor topography<sup>46</sup>. For the high band, saccade-related  
350 transient potentials were removed additionally<sup>47</sup>. Finally, all epochs were visually inspected  
351 and epochs with remaining artifacts were rejected. Furthermore, a subset of 19 electrodes (i.e.  
352 most outer facial, temporal and neck electrodes) was excluded from further analysis due to poor  
353 signal-to-noise ratio. Lastly, data was stratified such that all conditions in the ensuing analysis  
354 hold the same amount of data within subjects. On average,  $426 \pm 89$  trials per participant entered  
355 the analysis.

356 **Source reconstruction of band-limited signals.** Cleaned data in low and high bands  
357 were joined and epoched with respect to stimulus onset as well as change onset. Prior to filtering  
358 data into narrow bands by means of wavelet analysis, event related potentials were subtracted  
359 in order to remove phase-locked responses. A family of 40 complex Morlet wavelets  $w$  with  
360 lengths of 2 s was constructed for logarithmically spaced frequencies between 2 and 120 Hz.

361 
$$w(t, f_0) = A * e^{-\frac{t^2}{2\sigma_t^2}} * e^{2\pi f_0 t}$$

362 The number of cycles per wavelet ( $m$ ) were logarithmically spaced between 3 and 10 and  
363 subsequently rounded off. Wavelets were normalised by factor  $A = \sigma_t \sqrt{\pi}^{-\frac{1}{2}}$  with  $\sigma_t =$   
364  $m/2\pi f_0$ . Single trial data was convolved with the Morlet wavelets by multiplication in the  
365 frequency domain using fast fourier transformation with boxcar windows. Wavelet filtered  
366 single trial data was then reconstructed in source space using exact low-resolution brain  
367 electromagnetic tomography (eLORETA; regularisation: 0.05)<sup>48</sup>. Lead fields were computed  
368 for a three-shell head model<sup>49</sup>. The customised cortical grid was derived from a cortical surface  
369 provided by Freesurfer in MNI space by reducing the number of cortical nodes from 270000 to  
370 10000<sup>50</sup>. Dipole directions at each node of the cortical grid were estimated by means of singular  
371 value decomposition of the trial averaged spectral power individually for all bands and kept  
372 constant for all trials of the given participant. Induced power was computed from these source  
373 reconstructed band-limited time domain signals. Power in the epoch after change onset was  
374 baseline corrected using the baseline of the mean over all conditions from -400 to -100 ms  
375 relative to stimulus onset (Fig. 2 a). By visual inspection of the resulting time-frequency  
376 landscapes, frequency bands in the theta, alpha, beta and gamma range were chosen  
377 individually for each participant (mean values and range in parentheses; theta: 4.7 [3.6; 5.8]  
378 Hz, alpha: 11.5 [9.2; 13.5] Hz, beta: 23.0 [17.2; 29.7] Hz, gamma: 78.9 [63.9; 87.6] Hz).  
379 Statistical analysis was carried out for the post-change interval ([0; 300] ms) only.

## 380 **Statistical analysis**

381 **Behaviour.** Accuracy of responding (ACC) within experimental conditions was  
382 analysed using a repeated-measures analysis of variance (ANOVA) with factors *ATTENTION*  
383 (VT vs. AV) and *CONGRUENCE* (congruent vs. incongruent). The timing of verbal responses  
384 was not analysed because subjects were instructed to withhold responses until stimulus offset.  
385 Instead, data from the previous behavioural study was re-analysed for the sub-sample of  
386 participants enrolled in this EEG study<sup>21</sup>. The same ANOVA as described above for ACCs was  
387 evaluated.

388 **EEG: Regions of interest (ROIs) analysis.** Primary cortical regions for vision, audition  
389 and tactile perception were chosen from the Freesurfer atlas which is constructed by gyral  
390 identification and parcellation based on anatomical landmarks<sup>50</sup>. For each frequency band,  
391 baseline-corrected, time and ROI averaged data in the post-change interval was evaluated by  
392 means of ANOVA with factors *ROI* (visual vs. auditory vs. somatosensory), *ATTENTION* (VT  
393 vs. AV) and *CONGRUENCE* (congruent vs. incongruent) and. Simple effects of significant  
394 ANOVA effects were assessed by paired-sample t-tests applying Bonferroni correction.

395 ***EEG: Whole-brain permutation statistics.*** Complementing ROI analysis, a whole brain  
396 exploratory analysis of differences between experimental conditions was conducted and  
397 evaluated by means of nonparametric cluster-based permutation statistics<sup>51</sup>. A null distribution  
398 was computed by randomly drawing trials into two sets per subject (300000 permutations). For  
399 each node of the cortical grid, a paired-sample t-test was computed between averaged power of  
400 the two sets and statistical maps were thresholded ( $p < .05$ ). Significant clusters were found and  
401 the size of the largest cluster was noted. This procedure was carried out separately for the four  
402 frequency bands. Contrasts corresponding to a 2 (*ATTENTION*) x 2 (*CONGRUENCE*) design  
403 were computed and evaluated against the aforementioned null-hypothesis (cut-off: 99th  
404 percentile). Reported  $p$ -values are Bonferroni-corrected.

405 Cluster statistics were complemented by post-hoc analyses that were designed (1) to  
406 detail on the time-course of the *ATTENTION* effect and (2) to disentangle the contributions of  
407 sub-conditions to the overall effect of *CONGRUENCE*.

408(1) For clusters showing a significant effect of *ATTENTION*, we computed the time course of  
409 average within cluster spectral power separately for visual-tactile and audio-visual conditions.  
410 Significance of the difference between time courses was evaluated using nonparametric cluster-  
411 based permutation statistics (300000 permutations). For each permutation, time courses were  
412 shuffled and paired-sample t-tests between VT and AV were computed for each sample. The  
413 number of samples included in the longest temporally continuous cluster of significant  
414 difference was noted to form the maximum statistic null distribution. In the original data,  
415 periods of significant difference between attentional conditions were considered significant in  
416 the temporal domain when they held more samples than the 99th percentile of the null  
417 distribution.

418(2) For this analysis we differentiated according to whether attended stimulus components were  
419 “fully congruent” or “distracted congruent”. Fully congruent (FC) means that all stimulus  
420 components, including the distracting modality, change congruently (that is, all components  
421 increased or decreased in intensity; Fig. 1 b, top box). Distracted congruent (DC) means that  
422 the distractor’s change direction deviates from the change direction in the attended modalities  
423 (Fig. 1 b, middle boxes). In this case, the participant has to resolve the conflict between attended  
424 congruence and unattended incongruence. In order to disentangle these two scenarios, we  
425 computed contrasts of FC respectively DC against attended incongruent conditions.

426

427

428

429



430

## References

- 431 1. Pessoa L., Kastner S. & Ungerleider L. G. Neuroimaging studies of attention: From  
432 modulation of sensory processing to top-down control. *J Neurosci.* 23, 3990-3998  
433 (2003).
- 434 2. Ling S., Liu T. & Carrasco M. How spatial and feature-based attention affect the gain  
435 and tuning of population responses. *Vision Res.* 49, 1194-1204 (2009).
- 436 3. Chaumon M. & Busch N. A. Prestimulus neural oscillations inhibit visual perception  
437 via modulation of response gain. *J Cogn Neurosci.* 26, 2514-29 (2014).
- 438 4. Jensen O. & Mazaheri A. Shaping functional architecture by oscillatory alpha activity:  
439 gating by inhibition. *Front Hum Neurosci.* 4, 186 (2010).
- 440 5. Osipova D., Hermes D. & Jensen O. Gamma power is phase-locked to posterior alpha  
441 activity. *PLoS One.* e3990 (2008).
- 442 6. Worden M. S., Foxe J. J., Wang N. & Simpson G. V. Anticipatory biasing of  
443 visuospatial attention indexed by retinotopically specific alpha-band  
444 electroencephalography increases over occipital cortex. *J Neurosci.* 20, RC63 (2000).
- 445 7. Siegel M., Donner T. H., Oostenveld R., Fries P., & Engel A. K. Neuronal  
446 synchronization along the dorsal visual pathway reflects the focus of spatial attention.  
447 *Neuron.* 60, 709-19 (2008).
- 448 8. Foster J. J., Sutterer D. W., Serences J. T., Vogel E. K. & Awh E. Alpha-band  
449 oscillations enable spatially and temporally resolved tracking of covert spatial attention.  
450 *Psychol Sci.* 28, 929-941 (2017).
- 451 9. Mazaheri A., van Schouwenburg M. R., Dimitrijevic A., Denys D., Cools R. & Jensen  
452 O. Region-specific modulations in oscillatory alpha activity serve to facilitate  
453 processing in the visual and auditory modalities. *Neuroimage.* 87, 356-62 (2014).
- 454 10. Friese U., Daume JI., Göschl F., König P., Wang P. & Engel A. K. Oscillatory brain  
455 activity during multisensory attention reflects activation, disinhibition, and cognitive  
456 control. *Sci Rep.* 6, 32775 (2016).
- 457 11. Ghazanfar A. A. & Schroeder C. E. Is neocortex essentially multisensory? *Trends Cogn  
458 Sci.* 10, 278-85 (2006).
- 459 12. Koelewijn T., Bronkhorst A. & Theeuwesa J. Attention and the multiple stages of  
460 multisensory integration: A review of audiovisual studies. *Acta Psychol.* 134, 372-384  
461 (2010).
- 462 13. Senkowski D., Schneider T. R., Foxe J. J., & Engel A. K. Crossmodal binding through  
463 neural coherence: implications for multisensory processing. *Trends in Neurosciences.*  
464 31, 401-409 (2008).
- 465 14. Bien N., ten Oever S., Goebel R. & Sack A. T. The sound of size: Cross-modal binding  
466 in pitch-size synesthesia: A combined TMS, EEG and psychophysics study.  
467 *Neuroimage* 59, 663-672 (2012).
- 468 15. Schneider T. R., Debener S., Oostenveld R. & Engel A. K. Enhanced EEG gamma-band  
469 activity reflects multisensory semantic matching in visual-to-auditory object priming.  
470 *Neuroimage* 42, 1244-54 (2008).
- 471 16. Konen C. S. & Haggard P. Multisensory parietal cortex contributes to visual  
472 enhancement of touch in humans: A single-pulse TMS study. *Cereb Cortex* 24, 501-  
473 507 (2014).

- 474 17. Cappe C. & Barone P. Heteromodal connections supporting multisensory integration at  
475 low levels of cortical processing in the monkey. *Eur J Neurosci.* 22, 2886-2902 (2005).
- 476 18. Senkowski D., Talsma D., Herrmann C. S. & Woldorff M. G. Multisensory processing  
477 and oscillatory gamma responses: effects of spatial selective attention. *Exp Brain Res.*  
478 166, 411-426 (2005).
- 479 19. Lakatos P., O'Connell M. N., Barczak A., Mills A., Javitt D. C. & Schroeder C. E. The  
480 leading sense: Supramodal control of neurophysiological context by attention. *Neuron*  
481 64, 419-30 (2009).
- 482 20. van Atteveldt N., Murray M. M., Thut G. & Schroeder C. Multisensory integration:  
483 flexible use of general operations. *Neuron* 81, 1240–1253 (2014).
- 484 21. Keil J. & Senkowski D. Neural oscillations orchestrate multisensory processing. *The*  
485 *Neuroscientist.* 1-18 (2018).
- 486 22. Misselhorn J., Daume J., Engel A. K. & Fries U. A matter of attention: Cross-modal  
487 congruence enhances and impairs performance in a novel trimodal matching paradigm.  
488 *Neuropsychologia* 88, 113-122 (2015).
- 489 23. Watson A. B. & Pelli D. G. QUEST: a Bayesian adaptive psychometric method.  
490 *Perception & Psychophysics* 33, 113–120 (1983).
- 491 24. Meredith M. A. & Stein B. E. Visual, auditory, and somatosensory convergence on cells  
492 in superior colliculus results in multisensory integration. *J Neurophysiol.* 56, 640-62  
493 (1986).
- 494 25. Corbetta M., Akbudak E., Conturo T. E., Snyder A. Z., Ollinger J. M., Drury H. A. et  
495 al. A common network of functional areas for attention and eye movements. *Neuron* 21,  
496 761-773 (1998).
- 497 26. Grosbas M. H. & Paus T. Transcranial magnetic stimulation of the human frontal eye  
498 field: effects on visual perception and attention. *J Cogn Neurosci.* 14, 1109-20 (2002).
- 499 27. Muggleton N. G., Juan C. H., Cowey A. & Walsh V. Human frontal eye fields and visual  
500 search. *J Neurophysiol.* 89, 3340-3 (2003).
- 501 28. Moore T. & Armstrong K. M. Selective gating of visual signals by microstimulation of  
502 frontal cortex. *Nature* 421, 370-373 (2003).
- 503 29. Silvanto J., Lavie N. & Walsh V. Stimulation of the human frontal eye fields modulates  
504 sensitivity of extrastriate visual cortex. *J Neurophysiol.* 96, 941-5 (2006).
- 505 30. Quentin R., Chanes L., Vernet M. & Valero-Cabré A. Fronto-parietal anatomical  
506 connections influence the modulation of conscious visual perception by high-beta  
507 frontal oscillatory activity. *Cereb Cortex* 25, 2095-2101 (2015).
- 508 31. Ruff C. C., Blankenburg F., Bjoertomt O., Bestmann S., Freeman E., Haynes J. D. et al.  
509 Concurrent TMS-fMRI and psychophysics reveal frontal influences on human  
510 retinotopic visual cortex. *Curr Biol.* 16, 1479-1488 (2006).
- 511 32. Marshall T. R., O'Shea J., Jensen O. & Bergmann T. O. Frontal eye fields control  
512 attentional modulation of alpha and gamma oscillations in contralateral occipitoparietal  
513 cortex. *J Neurosci.* 35, 1638-1647 (2015).
- 514 33. Marshall T. R., Bergmann T. O. & Jensen O. Frontoparietal structural connectivity  
515 mediates the top-down control of neuronal synchronization associated with selective  
516 attention. *PLoS Biol.* 13, e1002272 (2015).
- 517 34. Hecht D. & Reiner M. Sensory dominance in combinations of audio, visual and haptic  
518 stimuli. *Exp Brain Res.* 193, 307-14 (2009).

- 519 35. Donaldson P. H., Rineheart N. J. & Enticott P. G. Noninvasive stimulation of the  
520 temporoparietal junction: A systematic review. *Neurosci Biobehav Rev.* 55, 547-572  
521 (2015).
- 522 36. Karnath H. New insights into the functions of the superior temporal cortex. *Nat Rev*  
523 *Neurosci.* 2, 568-576 (2001).
- 524 37. Friedrich F. J., Egly R., Rafal R. D. & Beck D. Spatial attention deficits in humans: A  
525 comparison of superior parietal and temporal-parietal junction lesions.  
526 *Neuropsychology* 12, 193-207 (1998).
- 527 38. Corbetta M. & Shulmann G. L. Control of goal-directed and stimulus-driven attention  
528 in the brain. *Nat Rev Neurosci.* 3, 201-15 (2002).
- 529 39. Göschl F., Friese U., Daume J., König P. & Engel A. K. Oscillatory signatures of  
530 crossmodal congruence effects: An EEG investigation employing a visuotactile pattern  
531 matching paradigm. *Neuroimage* 116, 177-186 (2015).
- 532 40. Romero Y. R., Keil J., Balz J., Niedeggen M., Gallinat J., & Senkowski D. Alpha-Band  
533 Oscillations Reflect Altered Multisensory Processing of the McGurk Illusion in  
534 Schizophrenia. *Front Hum Neurosci.* 10, 41 (2016).
- 535 41. Wang W., Hu L., Cui H., Xie X. & Hu Y. Spatio-temporal measures of  
536 electrophysiological correlates for behavioral multisensory enhancement during visual,  
537 auditory and somatosensory stimulation: A behavioral and ERP study. *Neurosci Bull.*  
538 29, 715–724 (2013).
- 539 42. Peng W., Hu L., Zhang Z. & Hu Y. Causality in the association between P300 and Alpha  
540 event-related desynchronization. *PLoS One* 7, e34163 (2012).
- 541 43. Womelsdorf T., Johnston K., Vinck M. & Everling S. Theta-activity in anterior  
542 cingulate cortex predicts task rules and their adjustments following errors. *Proc*  
543 *NatlAcad Sci USA* 107, 5248-53 (2010).
- 544 44. Menon V. & Uddin L. Q. Saliency, switching, attention and control: a network model  
545 of insula function. *Brain Struct Funct.* 214, 655-667 (2010).
- 546 45. Delorme A, & Makeig S. EEGLAB: an open source toolbox for analysis of single-trial  
547 EEG dynamics. *J Neurosci Methods.* 134, 9-21 (2004).
- 548 46. Hipp J. & Siegel M. Dissociating neuronal gamma-band activity from cranial and ocular  
549 muscle activity in EEG. *Front Hum Neurosci.* 7, 338 (2013).
- 550 47. Hassler U., Trujillo-Barreto N. & Gruber T. Induced gamma band responses in human  
551 EEG after the control of miniature saccadic artifacts. *Neuroimage* 57, 1411-1421  
552 (2011).
- 553 48. Pascual-Marqui R. D., Lehmann D., Koukkou M., Kochi K., Anderer P., Saletu B. et al.  
554 Assessing interactions in the brain with exact low-resolution electromagnetic  
555 tomography. *Philos Trans A Math Phys Eng Sci.* 369, 3768-84 (2011).
- 556 49. Nolte G. & Dassios G. Analytic expansion of the EEG lead field for realistic volume  
557 conductors. *Phys Med Biol.* 50, 3807-23 (2005).
- 558 50. Desikan R. S., Segonne F., Fischl B., Quinn B. T., Dickerson B. C., Blacker D. et al. An  
559 automated labeling system for subdividing the human cerebral cortex on MRI scans into  
560 gyral based regions of interest. *Neuroimage* 31, 968-980 (2006).
- 561 51. Maris E. & Oostenveld R. Nonparametric statistical testing of EEG- and MEG-data. *J*  
562 *Neurosci Methods* 164, 177-90 (2007).

**a****attentional focus**

visual-tactile

audio-visual

tactile

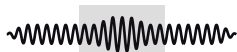

incongruent

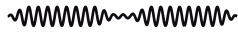

visual

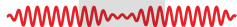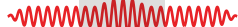

congruent

audio

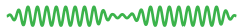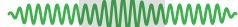**b****stimulus configurations**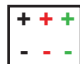**FC**  
(fully congruent)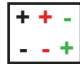**DC**  
(distracted congruent for VT)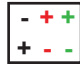**DC**  
(distracted congruent for AV)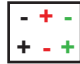**INC**  
(incongruent for VT and AV)**c****ACC**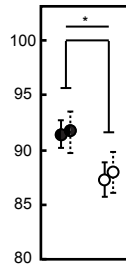

● VT ○ AV

— congruent  
..... incongruent**d****RT**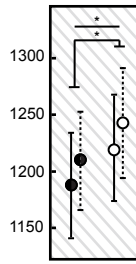— congruent  
..... incongruent

**a**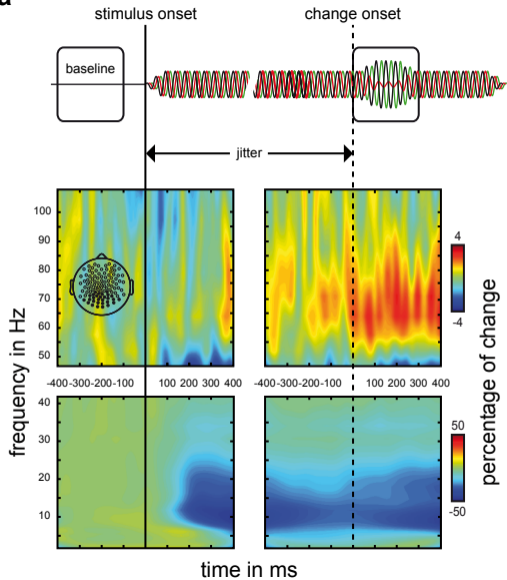**b**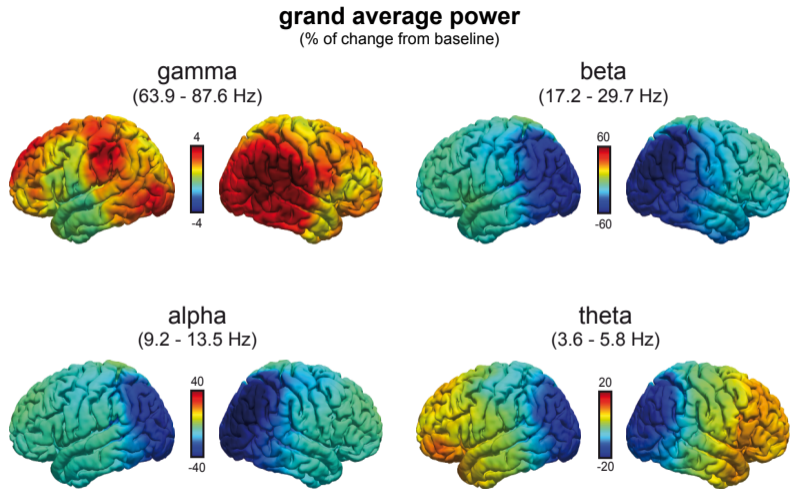



**a**

regions of interest (ROIs)

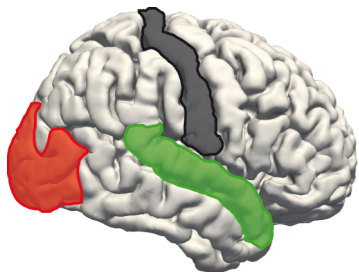**b**effect of *ROI*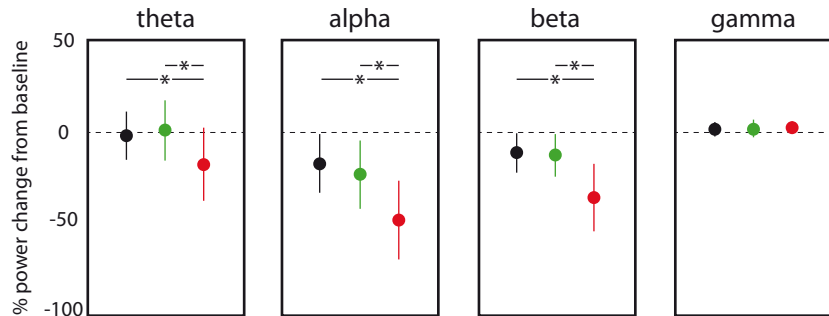**c**no effect of *ATTENTION*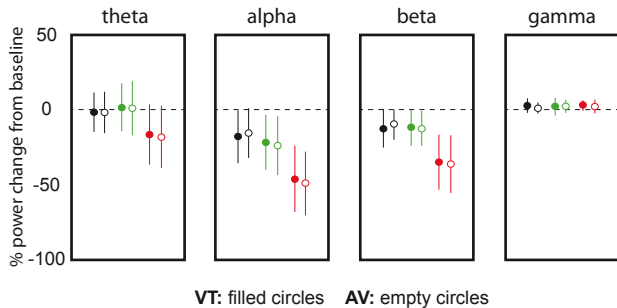**d**no effect of *CONGRUENCE*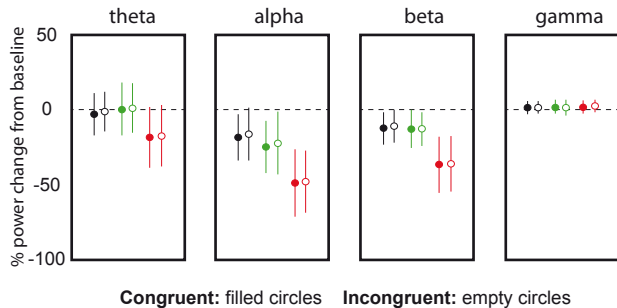

**a****alpha: VT - AV**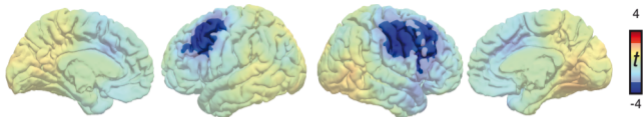**b**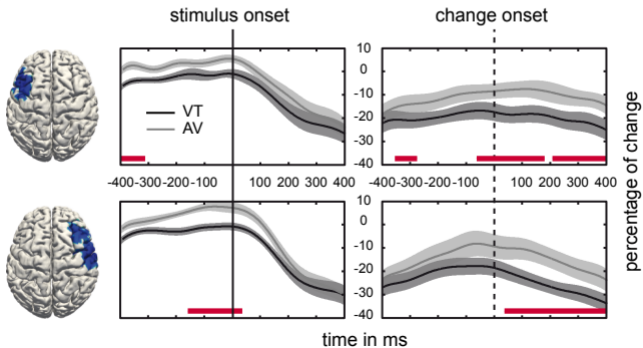

theta

alpha

a

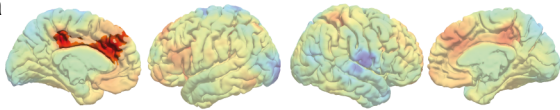

Con - Inc

b

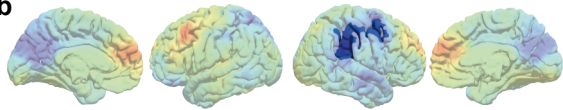

c

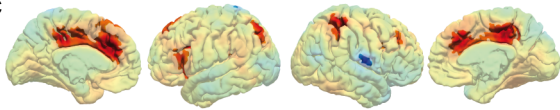

FC - Inc

d

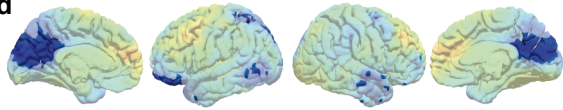

DC - Inc

f

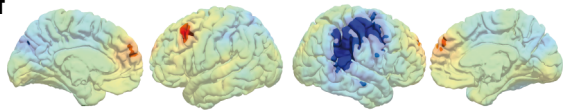

-4 *t-values* 4
